# Supplementary material
Source: ML conference proceedings conference paper supplement (https://openaccess.thecvf.com/content/ICCV2025/html/Dong_Can_We_Achieve_ICCV_2025_paper.html)
Supplement: Supplementary file 1 [file Dong_Can_We_Achieve_ICCV_2025_supplemental.pdf]

# Can We Achieve Efficient Diffusion without Self-Attention?

## Distilling Self-Attention into Convolutions

### (Supplementary Material)

Ziyi Dong<sup>1</sup> Chengxing Zhou<sup>1</sup> Weijian Deng<sup>2</sup> Pengxu Wei<sup>1,3</sup> Xiangyang Ji<sup>4</sup> Liang Lin<sup>1,3</sup>

<sup>1</sup>Sun Yat-sen University <sup>2</sup>Australian National University <sup>3</sup>Peng Cheng Laboratory <sup>4</sup>Tsinghua University

dongzy6@mail2.sysu.edu.cn, zhouchx33@mail2.sysu.edu.cn, dengwj16@gmail.com,

weipx3@mail.sysu.edu.cn, xyji@tsinghua.edu.cn, linliang@ieee.org

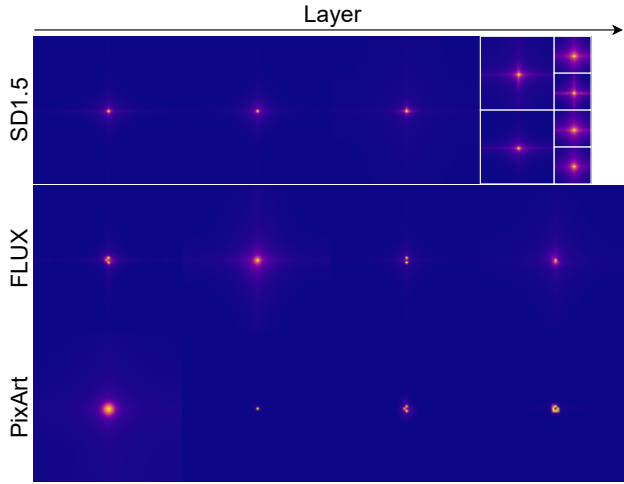

Figure I. Averaged centroid-aligned attention maps of different layers. U-Net models (*e.g.* SD1.5) has multi-scale attention maps.

#### A. Averaged Centroid-Aligned Attention Maps

To gain deeper insights into the localized pattern as analyze in Sec. 3, Fig. I presents averaged centroid-aligned attention maps, where each attention map is shifted such that the query point is centered, making it the anchor. This transformation enables direct comparison of attention distributions across different spatial locations, revealing a strong locality pattern.

#### B. Visualization Results

More visualization results of our  $\Delta$ ConvFusion and original self-attention based diffusion models are shown in Fig. IV. The images produced by our  $\Delta$ ConvFusion exhibit enhanced visual realism and improved semantic alignment with textual prompts.

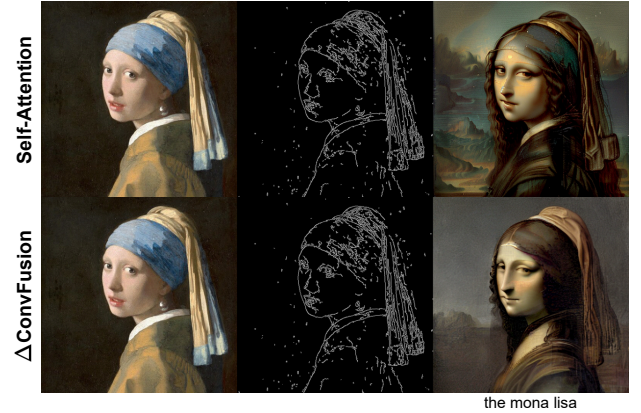

Figure II. Images generate with our  $\Delta$ ConvFusion and self-attention based diffusion model (SD1.5) while applying ControlNet.

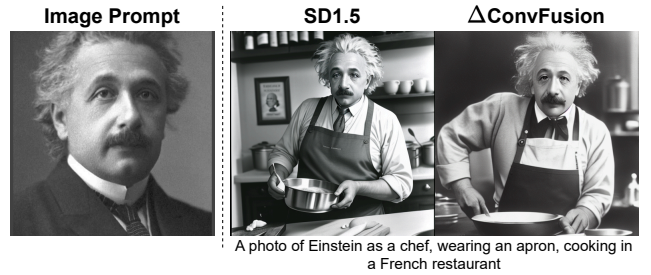

Figure III. Images generate with our  $\Delta$ ConvFusion and self-attention based diffusion model (SD1.5) while applying IP-Adapter.

#### C. Extend Tasks

Our  $\Delta$ ConvFusion remains compatible with existing methods and adapters that are trained with self-attention diffusion models, such as ControlNet, which incorporates spatial conditions, the IP-Adapter, which uses images as prompts, and inpainting operations.

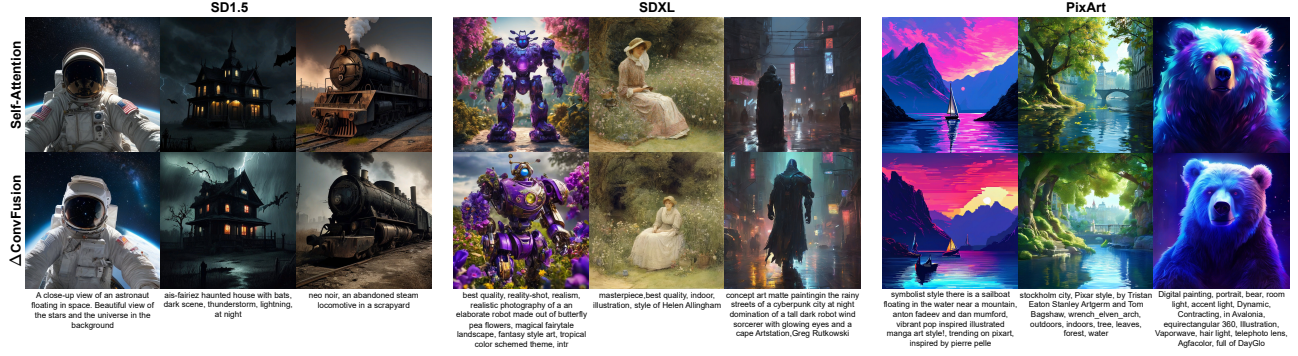

Figure IV. Generated images of our  $\Delta$ ConvFusion and original self-attention based diffusion models across SD1.5, SDXL and PixArt.

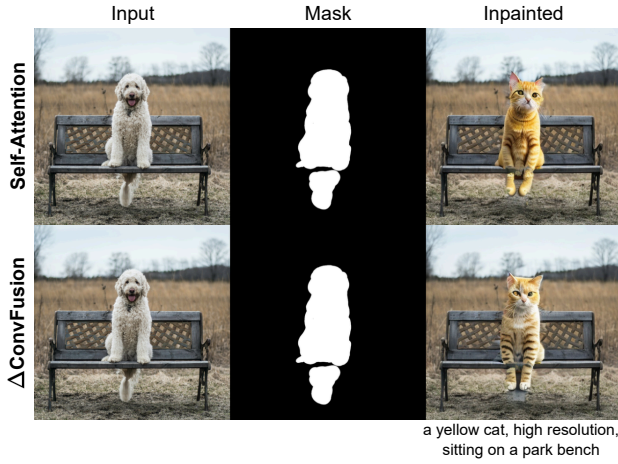

Figure V. Result of inpainting with our  $\Delta$ ConvFusion and self-attention based diffusion model (SD1.5).

### C.1. Generate with ControlNet

As shown in Fig. II, our  $\Delta$ ConvFusion is compatible with existing ControlNet models, enabling the model to generate images with spatial conditions.

### C.2. Generate with IP-Adapter

As shown in Fig. III,  $\Delta$ ConvFusion is compatible with existing IP-Adapters, which can enable using image as prompt.

### C.3. Inpainting

As shown in Fig. V, our  $\Delta$ ConvFusion effectively integrates with self-attention based diffusion inpainting methods, successfully replacing the dog in the image with a cat.

## D. Block-Wise ERF

In Fig. VI, we present the ERF of blocks at scales  $64 \times 64$  and  $32 \times 32$  in SD1.5. The figure demonstrates that the ERF distribution of  $\Delta$ ConvBlock closely resembles the pattern of the self-attention maps shown in Fig. I and Fig. 4b. This similarity further verifies that our design effectively captures the self-attention characteristics within the diffusion model.

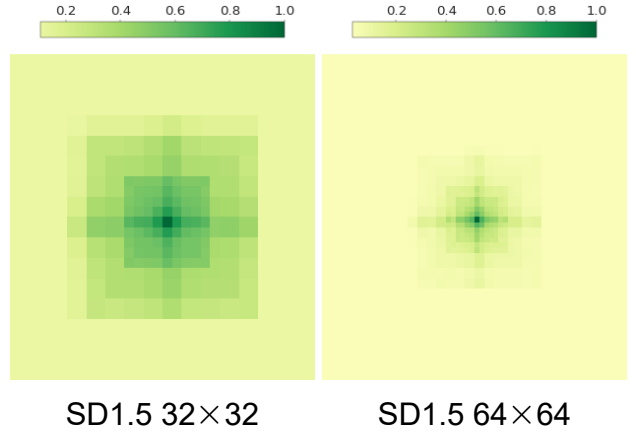

Figure VI. ERF of blocks at scales  $64 \times 64$  and  $32 \times 32$  in SD1.5

Table I. VRAM usage of self-attention and our  $\Delta$ ConvBlock with batch size of 32. The self-attention is running with FlashAttention.

|                     | Self-Attention | $\Delta$ ConvBlock |
|---------------------|----------------|--------------------|
| Memory ( $1024^2$ ) | 1.77GB         | 1.46GB             |
| Memory ( $4k$ )     | 14.68GB        | 12.17GB            |

## E. Memory Efficiency

Our method not only achieves faster computation but also requires less memory compared to self-attention. Tab. I presents the memory usage of our  $\Delta$ ConvBlock and self-attention. Our  $\Delta$ ConvBlock substantially reduces memory usage at both  $1024 \times 1024$  and  $4K$  resolutions.

## F. Naïve Baselines

Table II. FLOPs and performance of our  $\Delta$ ConvBlock and local attention (NA).

| Method       | Metrics |        |        | FLOPs ↓          |                   |        |          |
|--------------|---------|--------|--------|------------------|-------------------|--------|----------|
|              | DS ↑    | FDD ↓  | CLIP ↑ | 512 <sup>2</sup> | 1024 <sup>2</sup> | 4K     | 16K      |
| NA (K=13)    | 42.55   | 232.31 | 30.57  | 23.35            | 93.39             | 787.98 | 11819.72 |
| NA (K=17)    | 43.18   | 222.35 | 30.66  | 24.48            | 97.92             | 826.20 | 12393.03 |
| Ours (SD1.5) | 44.72   | 200.15 | 30.73  | 8.43             | 34.86             | 294.10 | 4411.40  |

We include the local attention (NA) [12] in the Tab. II. While it has linear complexity, local attention incurs higher memory costs than convolution, making it less efficient than our  $\Delta$ ConvBlock. Moreover, our method shows clear advantages over NA in image generation.

## G. Choice of Pyramid Kernel Size

Table III. Ablation analysis of pyramid kernel size.

| <b>K</b> | <b>DS <math>\uparrow</math></b> | <b>FDD <math>\downarrow</math></b> | <b>CLIP <math>\uparrow</math></b> |
|----------|---------------------------------|------------------------------------|-----------------------------------|
| 7        | 42.67                           | 186.50                             | 30.76                             |
| 13       | 42.56                           | 181.06                             | 30.84                             |
| 17       | 43.11                           | 182.87                             | 30.78                             |

According to the analysis in Tab. III, a larger kernel size does not necessarily lead to better performance. Therefore, we select  $K = 13$  (PixArt) and  $K = 9$  (SD1.5) for our experiments.
